# Supplementary material
Source: publisher site journal article supplement (https://www.dovepress.com/get_supplementary_file.php?f=340385.docx)
Supplement: Supplementary file 1 [file get_supplementary_file.php]

Appendix 1. International classification of diseases 9th and 10th version codes used for the identification of selected comorbidities.

| Comorbidity | ICD-9 codes | ICD-10 codes |
| --- | --- | --- |
| Cerebrovascular disease | 430.x – 438.x | G45.x – G46.x; H34.0; I60.x – I69.x |
| Chronic pulmonary disease | 490.x – 505.x; 506.4 | I27.8; I27.9; J40.x – J47.x; J60.x – J67.x; J68.4; J70.1; J70.3 |
| Diabetes | 250.x | E10.x – E14.x |
| Heart failure | 428.x | I09.9; I11.0; I13.0; I13.2; I25.5; I42.0; I42.5 – I42.9; I43.x; I50.x; P29.0 |
| Hypertension | 401.x – 405.x | I10.x – I13.x; I15.x |
| Peripheral vascular disease | 441.x; 443.9; 785.4; V43.4 | I70.x – I71.x; I73.1; I73.8; I73.9; I77.1; I79.0; I79.2; L55.1; K55.8; K55.9; Z95.8; Z95.9 |
| Renal disease | 582.x; 583.0 – 583.7; 585.x – 586.x; 588.x | I12.0 ; I13.1; N03.2 – N03.7; N05.2 – N05.7; N18.x – N19.x; N25.0; Z49.0 – Z49.2; Z94.0; Z99.2 |
